# Supplementary material for: Public Perceptions of Alternative Protein Sources: Implications for Responsible Agrifood Transition Pathways
Source: MDPI journal article supplement (doi:10.3390/su16020566), 2024-01-09
Supplement: s1 [file s1]

**Table S1.** Personal characteristics variables.

| Variable    | Question                                  | Scale                                                                                                                                                                               |
|-------------|-------------------------------------------|-------------------------------------------------------------------------------------------------------------------------------------------------------------------------------------|
| Age         | How old are you?                          | 20–39, 40–59, ≥60                                                                                                                                                                   |
| Gender      | What gender do you assign yourself?       | female, male, diverse                                                                                                                                                               |
| Education   | What is your highest degree?              | low level: no degree (yet), primary school, secondary school<br>intermediate level: grammar school, completed professional training<br>high level: university degree, doctorate/PhD |
| Location    | Where do you live?                        | small place (including small town, village, farm), town, city, big city                                                                                                             |
| Food habits | How do you assess your own eating habits? | traditional, rather traditional, rather adventurous, adventurous                                                                                                                    |

*Note.* Age, education and location were aggregated into larger groups for descriptive statistics (Table 1) and data analysis. Education clusters are in line with census data based on the Database of the Federal Statistical Office of Germany (Table 12211-0102) [69].

**Table S2.** Descriptive statistics of study variables.

| Variable                                | N   | M    | SD   | Answer Options  |     |     |               |
|-----------------------------------------|-----|------|------|-----------------|-----|-----|---------------|
|                                         |     |      |      | 1 = Thumbs Down | 2   | 3   | 4 = Thumbs Up |
| Perceived possibility                   |     |      |      |                 |     |     |               |
| Algae                                   | 474 | 3.63 | 0.71 | 12              | 29  | 80  | 353           |
| Crickets                                | 459 | 2.60 | 1.19 | 123             | 84  | 104 | 148           |
| Jellyfish                               | 471 | 2.22 | 1.08 | 154             | 140 | 98  | 79            |
| Perceived probability                   |     |      |      |                 |     |     |               |
| Algae                                   | 474 | 3.42 | 0.75 | 8               | 50  | 151 | 265           |
| Crickets                                | 459 | 3.09 | 0.9  | 27              | 86  | 166 | 180           |
| Jellyfish                               | 471 | 2.34 | 0.89 | 77              | 212 | 126 | 56            |
| Perceived probability extreme scenarios |     |      |      |                 |     |     |               |
| Algae                                   | 474 | 3.54 | 0.71 | 8               | 38  | 117 | 311           |
| Crickets                                | 459 | 3.38 | 0.82 | 19              | 43  | 140 | 257           |
| Jellyfish                               | 471 | 2.76 | 0.93 | 47              | 134 | 176 | 114           |

**Table S3.** Spearman's correlations of study variables.

| Variable                                | 1    | 2    | 3    | 4    | 5    | 6    | 7    | 8    | 9    |
|-----------------------------------------|------|------|------|------|------|------|------|------|------|
| Perceived possibility                   |      |      |      |      |      |      |      |      |      |
| Algae                                   | -    | 0.10 | 0.26 | 0.48 | 0.15 | 0.18 | 0.31 | 0.16 | 0.12 |
| Crickets                                | 0.10 | -    | 0.56 | 0.10 | 0.57 | 0.34 | 1.17 | 0.45 | 0.22 |
| Jellyfish                               | 0.26 | 0.56 | -    | 0.25 | 0.34 | 0.61 | 0.08 | 0.25 | 0.42 |
| Perceived probability                   |      |      |      |      |      |      |      |      |      |
| Algae                                   | 0.48 | 0.10 | 0.25 | -    | 0.24 | 0.32 | 0.37 | 0.13 | 0.19 |
| Crickets                                | 0.15 | 0.57 | 0.34 | 0.24 | -    | 0.41 | 0.09 | 0.66 | 0.28 |
| Jellyfish                               | 0.18 | 0.34 | 0.61 | 0.32 | 0.41 | -    | 0.16 | 0.27 | 0.59 |
| Perceived probability extreme scenarios |      |      |      |      |      |      |      |      |      |
| Algae                                   | 0.31 | 0.00 | 0.08 | 0.37 | 0.09 | 0.16 | -    | 0.19 | 0.40 |
| Crickets                                | 0.16 | 0.45 | 0.25 | 0.13 | 0.66 | 0.27 | 0.19 | -    | 0.39 |
| Jellyfish                               | 0.12 | 0.22 | 0.42 | 0.19 | 0.28 | 0.59 | 0.40 | 0.39 | -    |

**Table S4.** Spearman's correlations of personal characteristics variables.

| Variable | Age | Gender | Education | Location | Food Habits |
|----------|-----|--------|-----------|----------|-------------|
|----------|-----|--------|-----------|----------|-------------|

|             |           |         |           |          |         |
|-------------|-----------|---------|-----------|----------|---------|
| Age         | -         | 0.15 ** | −0.19 *** | −0.09 *  | −0.10 * |
| Gender      | 0.15 **   | -       | −0.08     | 0.11 *   | −0.04   |
| Education   | −0.19 *** | −0.08   | -         | 0.16 *** | 0.03    |
| Location    | −0.09 *   | 0.11 *  | 0.16 ***  | -        | 0.09    |
| Food habits | −0.10*    | −0.04   | 0.03      | 0.09     | -       |

*Note.* Gender was recoded as female = 0 and male = 1 (diverse was excluded), age and education were coded from low to high, location from small to big and food habits as traditional = 0 and adventurous = 1. \*\*\*  $p < 0.001$ , \*\*  $p < 0.01$ , \*  $p < 0.05$ .
